# Supplementary material
Source: Elsevier journal article supplement (https://www.sciencedirect.com/science/article/pii/S0365669120301350)
Supplement: mmc1 [file S0365669120301350:mmc1.pdf]

## Apéndice A. Recomendaciones adicionales sobre limpieza (equipos, material)

- No se realizarán de forma obligatoria medidas de presión intraocular, salvo en casos de sospecha fundada de problema franco con la presión intraocular (p.e. recién operados con clínica sugestiva). No se realizarán tonometrías de aire en ningún caso por el riesgo de generar aerosoles.<sup>11</sup> En los casos indicados, se realizarán tonometrías Goldmann o con Icare®. No se utilizarán tonómetros de tipo Perkins salvo los casos descritos en el punto 12 de las recomendaciones generales. El tonómetro se desinfectará siguiendo el procedimiento de limpieza-desinfección habitual con los productos que se están utilizando. La sonda del Icare® se retirará con guantes y se desechará con cada paciente.
- Las sondas de biometría ultrasónica, ecografía y biomicroscopía ultrasónica así como las lentes de exploración de contacto (Goldman, panfundoscópica, 78 o 90 Dp) y restantes dispositivos que entren en contacto con la córnea se limpiarán-desinfectarán según el siguiente procedimiento:
  - **Material semicrítico**
    - Enjuague durante al menos 30 segundos en agua.
    - Limpiar con jabón líquido.
    - Enjuague nuevamente con agua durante 30 segundos.
    - Limpiar el dispositivo con un paño con alcohol isopropílico al 70%.
    - Se recomienda realizar después un enjuague completo con agua y secado al aire.
    - Fibroscopio: Limpieza exhaustiva con jabón enzimático inmediatamente después de utilizar. Desinfección de Alto Nivel (DAN) con el producto actualmente utilizado.
  - **Material crítico**
    - Limpieza exhaustiva con jabón enzimático inmediatamente después de utilizar.
    - Sumergir en el jabón enzimático durante 10-15 min.
    - Enjuagar con agua durante 30 segundos y secar.
    - Empaquetar y enviar a esterilizar siguiendo el circuito habitual.
- Salvo necesidad urgente, no se realizarán endoscopias nasales. Si se tuvieran que realizar, se utilizarán los EPI apropiados.<sup>11</sup>
- Las gotas se instilarán con guantes y los colirios se desecharán por cada paciente.
- La limpieza y desinfección de los instrumentos de la consulta y de las superficies en contacto con los pacientes es una de las medidas principales para contener la infección.<sup>1,7,8,11</sup> Por ello este procedimiento se realizará al terminar cada jornada (de mañana y de tarde) con el desinfectante aplicado sobre las superficies, mediante pulverización o toallas de uso habitual hospitalario, dejando a continuación secarse al aire para mantener su acción remanente.
